# Supplementary material
Source: PubMed Central journal article supplement (PMC7739497)

## Supplementary Tables

**Table S1:** Overview of all experiments

|                     | Question                                                                                            | sample size (n) | Figures/Tables                    |
|---------------------|-----------------------------------------------------------------------------------------------------|-----------------|-----------------------------------|
| <i>Experiment 1</i> | Is olfactory information important for cooperative decisions?                                       | 23/21           | Figure 1 & S1<br>Table S2,S3 & S7 |
| <i>Experiment 2</i> | Is olfactory information important for cooperation decisions when receiving or when providing help? | 23              | Figure S2<br>Table S4             |
| <i>Experiment 3</i> | Does the smell of cooperation suffice to induce cooperative behaviour?                              | 24              | Figure S3<br>Table S5             |
| <i>Experiment 4</i> | Does the performance of cooperation trigger cooperative responses?                                  | 24              | Figure S4<br>Table S6             |

**Table S2:** Pulling frequency (Experiment 1)

| Response                                    | Fixed Effects                               | $\beta$                                   | SE           | z-value       | <i>p</i>         |
|---------------------------------------------|---------------------------------------------|-------------------------------------------|--------------|---------------|------------------|
| <b>Direct reciprocity</b>                   | Intercept                                   | -0.328                                    | 0.233        | -1.405        |                  |
|                                             | <b>Partner (D)</b>                          | <b>-1.135</b>                             | <b>0.271</b> | <b>-4.189</b> | <b>&lt;0.001</b> |
|                                             | <b>Olfactory information (yes)</b>          | <b>0.993</b>                              | <b>0.262</b> | <b>3.795</b>  | <b>&lt;0.001</b> |
| Number of pulls<br>GLMM (Poisson)<br>N = 23 | Partner (D) : Olfactory information (yes)   | -0.406                                    | 0.587        | -0.690        | 0.490            |
| <b>Generalised reciprocity</b>              | <b>Intercept</b>                            | <b>1.316</b>                              | <b>0.107</b> | <b>12.255</b> | <b>&lt;0.001</b> |
|                                             | <b>Partner (D)</b>                          | <b>-0.657</b>                             | <b>0.134</b> | <b>-4.921</b> | <b>&lt;0.001</b> |
|                                             | Olfactory information (yes)                 | 0.072                                     | 0.127        | 0.571         | 0.568            |
|                                             | Number of pulls<br>GLMM (Poisson)<br>N = 21 | Partner (D) : Olfactory information (yes) | -0.433       | 0.269         | -1.612           |

Note that the estimates for the main effects are shown for a model without an interaction term

**Table S3a:** Latencies to first pull (Experiment 1)

| Response                                                                                     | Fixed Effects                             | Coef          | SE(Coef)     | SE2           | $\chi^2$     | DF       | <i>p</i>         |
|----------------------------------------------------------------------------------------------|-------------------------------------------|---------------|--------------|---------------|--------------|----------|------------------|
| Direct reciprocity<br>Latencies to first pull<br>Cox proportional hazard<br>N=23             | Intercept                                 |               |              |               |              |          |                  |
|                                                                                              | Partner (D)                               | <b>-1.120</b> | <b>0.502</b> | <b>-0.498</b> | <b>4.99</b>  | <b>1</b> | <b>0.026</b>     |
|                                                                                              | Olfactory information (yes)               | <b>2.354</b>  | <b>0.465</b> | <b>0.450</b>  | <b>25.67</b> | <b>1</b> | <b>&lt;0.001</b> |
|                                                                                              | Partner (D) : Olfactory information (yes) | <b>-1.476</b> | <b>0.675</b> | <b>0.666</b>  | <b>4.79</b>  | <b>1</b> | <b>0.029</b>     |
| <b>Generalised reciprocity</b><br>Latencies to first pull<br>Cox proportional hazard<br>N=21 | Intercept                                 |               |              |               |              |          |                  |
|                                                                                              | Partner (D)                               | -0.450        | 0.347        | 0.343         | 1.68         | 1        | 0.19             |
|                                                                                              | Olfactory information (yes)               | <b>1.155</b>  | <b>0.355</b> | <b>0.347</b>  | <b>10.57</b> | <b>1</b> | <b>0.001</b>     |
|                                                                                              | Partner (D) : Olfactory information (yes) | <b>-1.602</b> | <b>0.526</b> | <b>0.519</b>  | <b>9.27</b>  | <b>1</b> | <b>0.002</b>     |

**Table S3b:** Post hoc Tukey comparisons for latency to first pull (Experiment 1)

| Response                                 | Fixed Effects                                | $\beta$        | SE           | z-value       | $p$              |
|------------------------------------------|----------------------------------------------|----------------|--------------|---------------|------------------|
| <b>Direct reciprocity</b><br>N = 23      | <b>Cooperative– uncooperative smell == 0</b> | <b>-2.5963</b> | <b>0.464</b> | <b>-5.596</b> | <b>&lt;0.001</b> |
|                                          | Cooperative– uncooperative no smell ==0      | -1.1203        | 0.502        | -2.233        | 0.113            |
| <b>Generalised reciprocity</b><br>N = 21 | <b>Cooperative– uncooperative smell == 0</b> | -2.0524        | 0.400        | -5.131        | <b>&lt;0.001</b> |
|                                          | Cooperative– uncooperative no smell ==0      | -0.4500        | 0.347        | -1.296        | 0.564            |

**Table S4a:** Is olfactory information important when receiving or providing help? (Experiment 2) Model output comparing the number of pulls when pulling for a partner (cooperative and uncooperative partners) whose smell was blocked in the experience phase (CNS; DNS) with when smell was blocked in the test phase (CSN; DSN).

| Wilcoxon signed-rank with continuity correction |         |  |  | V    | p     |
|-------------------------------------------------|---------|--|--|------|-------|
| Number of pulls<br>n= 23                        | CNS-CSN |  |  | 139  | 0.206 |
|                                                 | DNS-DSN |  |  | 65.5 | 0.916 |

  

| Response                        | Fixed Effects | Coeff | SE(Coeff) | SE2   | $\chi^2$ | DF | p    |
|---------------------------------|---------------|-------|-----------|-------|----------|----|------|
| Latencies to first pull<br>n=23 | CNS-CSN       | 0.043 | 0.337     | 0.337 | 0.02     | 1  | 0.9  |
|                                 | DNS-DSN       | 0.096 | 0.345     | 0.336 | 0.08     | 1  | 0.78 |

**Table S4b:** Comparing the pulling frequency and latency to first pull for cooperative and uncooperative partners from experiment 1 and experiment 2 combined.

| Response                 | Fixed Effects                         | $\beta$ | SE     | z-value | p                |
|--------------------------|---------------------------------------|---------|--------|---------|------------------|
| <b>Combined<br/>GLMM</b> | Cooperative–<br>uncooperative<br>== 0 | -0.657  | 0.1336 | -4.921  | <b>&lt;0.001</b> |

  

| Response                                                         | Fixed Effects           | Coeff  | SE(Coeff) | SE2   | $\chi^2$ | DF | p     |
|------------------------------------------------------------------|-------------------------|--------|-----------|-------|----------|----|-------|
| <b>Combined<br/>Latencies to first pull<br/>Cox prop. hazard</b> | Partner (uncooperative) | -0.722 | 0.246     | 0.243 | 8.65     | 1  | 0.003 |

**Table S5:** Does the smell of cooperation suffice to induce reciprocal returns? (Experiment 3): Model output comparing the number of pulls (top) and the latencies to the first pull (bottom) when pulling for a partner after experiencing an uncooperative stooge while being provided with smell of a cooperative partner or an uncooperative partner in the experience phase or in the test phase.

| Wilcoxon signed-rank with continuity correction |                   |            | V          | p            |
|-------------------------------------------------|-------------------|------------|------------|--------------|
|                                                 | Experience phase  | C-D        | 115        | 0.197        |
| <b>Number of pulls</b>                          |                   |            |            |              |
| <b>Wilcoxon signed-rank</b>                     | <b>Test phase</b> | <b>C-D</b> | <b>180</b> | <b>0.022</b> |

| Response                       | Fixed Effects    | Coeff              | SE(Coeff)     | SE2          | $\chi^2$     | DF          | p        |              |
|--------------------------------|------------------|--------------------|---------------|--------------|--------------|-------------|----------|--------------|
| <b>Latencies to first pull</b> | Experience phase | Partner (defector) | <b>-0.900</b> | <b>0.364</b> | <b>0.352</b> | <b>6.13</b> | <b>1</b> | <b>0.013</b> |
|                                | Test phase       | Partner (defector) | <b>-0.682</b> | <b>0.359</b> | <b>0.342</b> | <b>3.62</b> | <b>1</b> | <b>0.057</b> |

**Table S6:** Does individual identity ('cooperative' vs. 'uncooperative') or the performance of cooperation trigger cooperative responses? (Experiment 4): Model output comparing the number of pulls and the latencies to the first pull when pulling for a partner while receiving olfactory information from a conspecific in a different room that either does not help its respective own partner ('neutral') or which helps its partner ('cooperative').

| Response                    | Fixed effects                | V         | P            |
|-----------------------------|------------------------------|-----------|--------------|
| <b>Number of pulls</b>      | <b>Neutral - cooperative</b> | <b>27</b> | <b>0.003</b> |
| <b>Wilcoxon signed-rank</b> |                              |           |              |

| Response                       | Fixed Effects                | Coeff         | SE(Coeff)    | SE2          | $\chi^2$   | DF       | p            |
|--------------------------------|------------------------------|---------------|--------------|--------------|------------|----------|--------------|
| <b>Latencies to first pull</b> | <b>Neutral - cooperative</b> | <b>-0.695</b> | <b>0.352</b> | <b>0.352</b> | <b>3.9</b> | <b>1</b> | <b>0.048</b> |

**Table S7:** Adjusted p values (method =BH) from post hoc comparison using log rank tests for the latency to first pull

|                              | Empty Cage       | Cooperator<br>without smell | Cooperator<br>with smell | Non-cooperator<br>without smell |
|------------------------------|------------------|-----------------------------|--------------------------|---------------------------------|
| Cooperator without smell     | 0.0826           | -                           | -                        | -                               |
| Cooperator with smell        | <b>&lt;0.001</b> | <b>&lt;0.001</b>            | -                        | -                               |
| Non-cooperator without smell | 0.69473          | 0.0826                      | <b>&lt;0.001</b>         | -                               |
| Non-cooperator with smell    | 0.15436          | 0.69473                     | <b>&lt;0.001</b>         | 0.15374                         |

## Supplementary Figures

**Figure S1** Overview of the experimental procedure and set-up (a) and experienced treatments (b) for Experiment 1. All focal individuals experienced the treatments in a generalized (n= 21) and a direct (n= 23) reciprocity paradigm, followed by the respective test phase (see a). The control treatment was however only performed in the direct reciprocity paradigm. The order of each treatment was randomized for every focal individual. The experimental period was always preceded by one minute of acclimatisation time.

a)

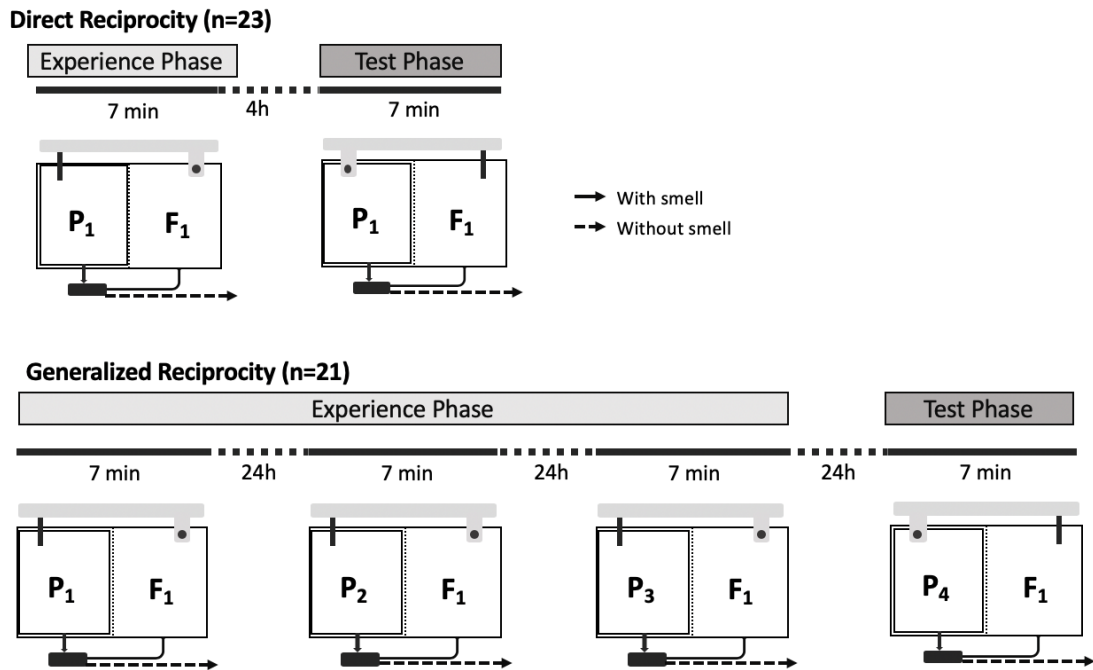

b)

|         |                | Smell                                                                  |                                                                        |
|---------|----------------|------------------------------------------------------------------------|------------------------------------------------------------------------|
|         |                | Yes                                                                    | No                                                                     |
| Partner | Non-cooperator | <b>Non-cooperator with Smell</b><br>(direct & generalized reciprocity) | <b>Non-cooperator with Smell</b><br>(direct & generalized reciprocity) |
|         | Cooperator     | <b>Control</b><br>(generalized reciprocity)                            | <b>Cooperator Without smell</b><br>(direct & generalized reciprocity)  |

**Figure S2** Overview of the experimental procedure and set-up (a) as well as the experienced treatments (b) for experiment 2. All focal individuals (n= 23) experienced the treatments in a random order. The experimental period was always preceded by one minute of acclimatisation time.

a)

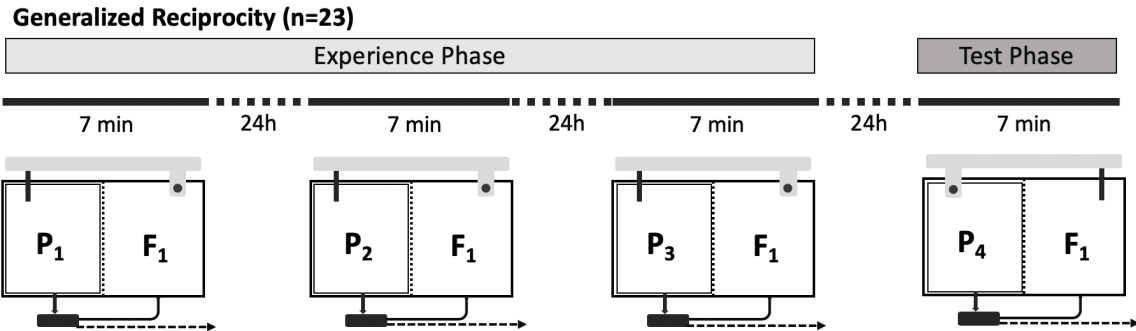

b)

|         |                | Smell                                                                                    |                                                                                    |
|---------|----------------|------------------------------------------------------------------------------------------|------------------------------------------------------------------------------------|
|         |                | Experience phase                                                                         | Test phase                                                                         |
| Partner | Non-cooperator | <p><b>Non-cooperator</b><br/>Smell in experience phase<br/>(generalized reciprocity)</p> | <p><b>Non-cooperator</b><br/>Smell in test phase<br/>(generalized reciprocity)</p> |
|         | Cooperator     | <p><b>Cooperator</b><br/>Smell in experience phase<br/>(generalized reciprocity)</p>     | <p><b>Cooperator</b><br/>Smell in test phase<br/>(generalized reciprocity)</p>     |

**Figure S3** Experimental treatments for experiment 3. Focal individuals ( $n=24$ ) experienced the smell of a cooperative or a non-cooperative individual ( $P_1$ ) that was pulling for a cage mate ( $CM_1$ , represented by a cage mate of  $P_1$ ) in an adjacent room in a randomized order in either the experience phase (a) or the test phase (b). While experiencing the smell of a conspecific in another room, focal rats always experienced the behaviour of a stooge ( $S_1$ ). The experimental period was always preceded by one minute of acclimatisation time.

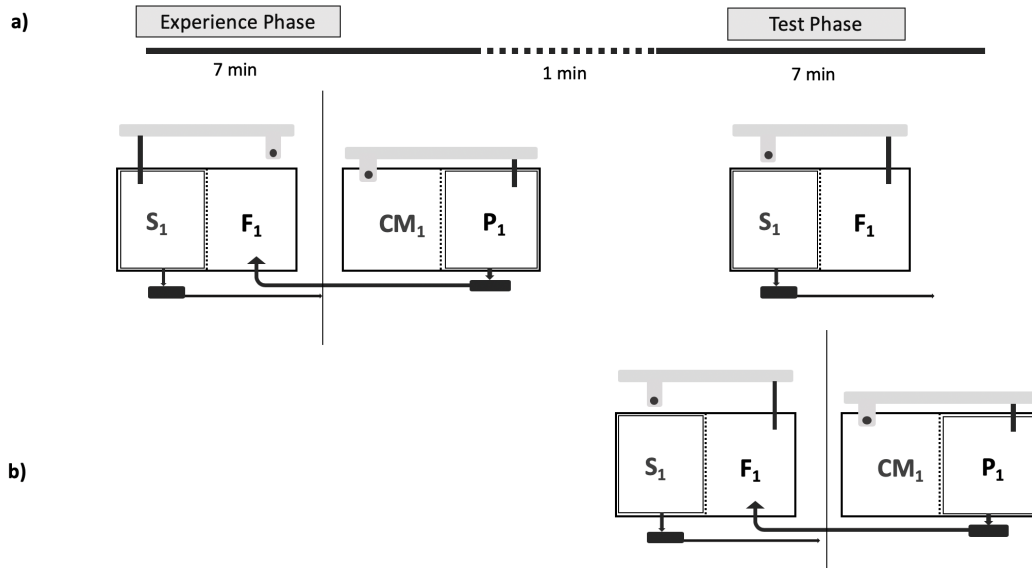



**Figure S4** Experimental procedure and set up for experiment 4. Focal individuals ( $n=24$ ) experienced the same partner either cooperating or in a neutral context in a randomized order. The experimental period was always preceded by one minute of acclimatisation time.

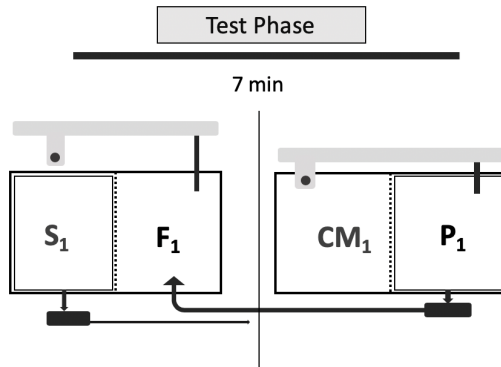

**Figure S5** Comparisons of number of pulls from experiment 1 including the empty cage control; The letters indicate significant differences from the posthoc Tukey comparison of a generalized liner mixed model including the number of pulls as response variable, treatment as explanatory variable and the identity as a random factor.

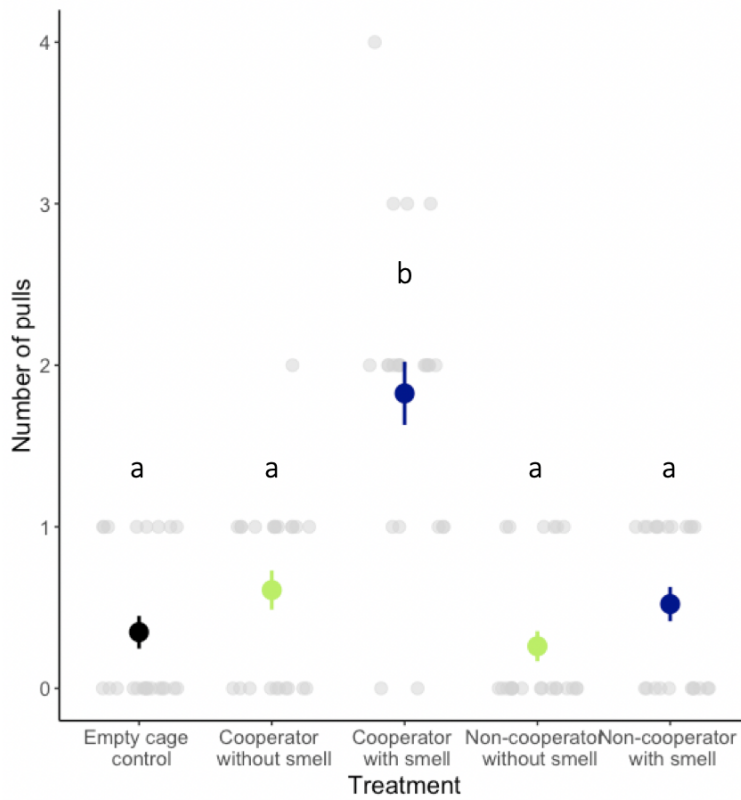

**Figure S6** Correlation plot of the number of pulls of cooperative rats and the number of pulls of focal individual as a proxy for the effect of “activity” for the pooled data from all experiments (N=159).  $r = 0.014$ ,  $p = 0.88$ .

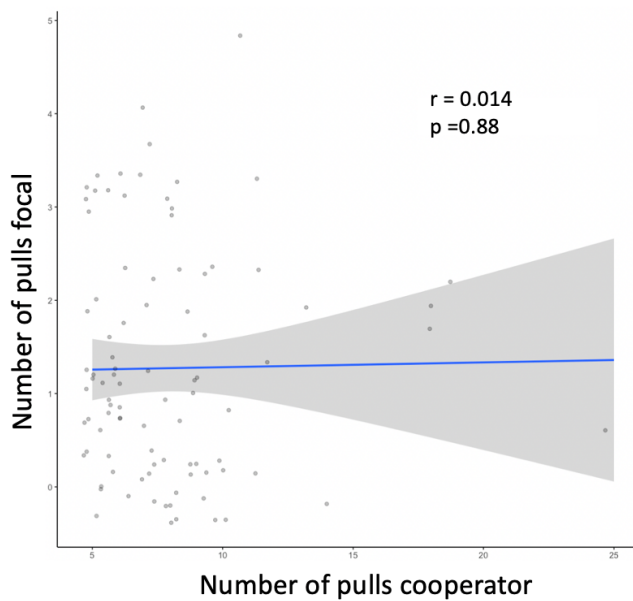

Supplement: rspb20202327supp1.pdf [file rspb20202327supp1.pdf]
